# Supplementary material for: Qualitative study exploring the key determinants of information gathering to inform the management of over-the-counter (OTC) consultations in community pharmacies
Source: PubMed Central journal article supplement — BMJ Open. 2019 Aug 15;9(8):e029937. doi: 10.1136/bmjopen-2019-029937 (PMC6701566; doi:10.1136/bmjopen-2019-029937), 2019-08-15
Supplement: bmjopen-2019-029937supp001.pdf [file bmjopen-2019-029937supp001.pdf]

### Supplementary File 1: Interview Topic Guide

**Behaviour of interest:** Gathering information during consultations for Pharmacy medicine requests.

**Research question:** What are the key determinants to eliciting information during consultations for Pharmacy medicines?

| Domain                                       | Interview Questions                                                                                                                                                                                                                                                                                                                     |
|----------------------------------------------|-----------------------------------------------------------------------------------------------------------------------------------------------------------------------------------------------------------------------------------------------------------------------------------------------------------------------------------------|
| <b>Knowledge</b>                             | What guidelines are you aware of for managing consultations for Pharmacy medicine requests?<br>If guidelines are named: What do those guidelines recommend? – for symptom-based consultations; for product requests<br>How do you use the guidelines?                                                                                   |
| <b>Skills</b>                                | What skills are required to elicit information during Pharmacy medicine request?<br>How do you go about obtaining information from a customer who asks about symptoms they are experiencing?<br>How do you go about obtaining information from a customer who asks for a specific Pharmacy medicine by product name?                    |
| <b>Social/professional role and identity</b> | How do you think that customers coming in for Pharmacy medicines see you?<br>Is there anything about your training/experience that influences the way you manage Pharmacy medicine requests?<br>Do you see your role differently when a customer asks for a specific Pharmacy medicine rather than describing a set of symptoms to you? |
| <b>Beliefs about capabilities</b>            | What problems/difficulties do you encounter eliciting information during Pharmacy medicine consultations?<br>What would help you overcome these difficulties?<br>How confident are you asking customers for information during Pharmacy medicine requests?                                                                              |
| <b>Beliefs about consequences</b>            | What are the benefits of gathering information during Pharmacy medicine requests?<br>What are the potential problems of not gathering exchanging information during Pharmacy medicine requests?<br>(harms avoided, benefits to customer, pharmacy, NHS, financial, long/short term)                                                     |
| <b>Motivation and goals</b>                  | How important do you feel seeking information is in the work of the pharmacy during Pharmacy medicine consultations?<br>How important do you feel seeking information to the customer during Pharmacy medicine requests?                                                                                                                |
| <b>Intentions</b>                            | How do you intend to seek information from customers during Pharmacy medicine requests?<br>Do your intentions differ when a customer approaches with a specific Pharmacy medicine request rather than a description of their symptoms?<br>If so, how?                                                                                   |
| <b>Reinforcement</b>                         | Are there any incentives to elicit information from customers during Pharmacy medicine requests?<br>If so, what are those incentives? Do they work?<br>If not, what would be a suitable incentive?                                                                                                                                      |

|                                                 |                                                                                                                                                                                                                                                                                                                                                                                                                                                                                                       |
|-------------------------------------------------|-------------------------------------------------------------------------------------------------------------------------------------------------------------------------------------------------------------------------------------------------------------------------------------------------------------------------------------------------------------------------------------------------------------------------------------------------------------------------------------------------------|
| <b>Optimism</b>                                 | Do you believe that eliciting information during Pharmacy medicine requests can be improved?<br>Are you confident that you give your patient the best service possible/Are you happy/content with the service you deliver?                                                                                                                                                                                                                                                                            |
| <b>Memory, attention and decision processes</b> | What prompts you to think about guidelines/recommendations when eliciting information during Pharmacy medicine requests?<br>In what situations might it be difficult to elicit information from a customer during Pharmacy medicine requests?<br>For MCAs: What prompts you to involve the pharmacist when eliciting information during a Pharmacy medicine request?<br>For MCAs: What makes it easy for you to involve the pharmacist when eliciting information during a Pharmacy medicine request? |
| <b>Environmental context and resources</b>      | What factors within the pharmacy influence how you seek information from a customer who requests a Pharmacy medicine?<br>What aspects of the pharmacy environment (lack of privacy, locations of products...) that help or hinder gathering information during Pharmacy medicine requests?                                                                                                                                                                                                            |
| <b>Social influences</b>                        | Would you say that the way you elicit information during Pharmacy medicine requests is influenced by your colleagues?<br>For MCAs: specify other counter staff/pharmacist<br>How does that influence the way that you gather information during Pharmacy medicine requests?<br>Do customers have views on the management of Pharmacy medicine requests?<br>Do these differ according to whether they presented with symptoms or asked for a specific medicine?<br>How do these views affect you?      |
| <b>Emotion</b>                                  | What feelings surround/are linked with eliciting information during Pharmacy medicine requests for you?<br>Do these feelings lead to worry or work stress?                                                                                                                                                                                                                                                                                                                                            |
| <b>Behavioural regulation</b>                   | If you were thinking about changing the way you elicit information during Pharmacy medicine requests how could you do this?<br>What could you do to increase information seeking with customers asking for specific Pharmacy medicines?<br>Are there procedures or ways of working that might encourage you to seek information from customers requesting Pharmacy medicines?                                                                                                                         |

*Participants will also be given the opportunity to add any further thoughts on barriers or enablers for eliciting information during Pharmacy medicine requests if they wish to do so.*

*Summary post-interview – general points about place and time, environments, atmosphere, interviewee's tone of voice etc*
