# Supplementary material for: Qualitative study exploring the key determinants of information gathering to inform the management of over-the-counter (OTC) consultations in community pharmacies
Source: PubMed Central journal article supplement — BMJ Open. 2019 Aug 15;9(8):e029937. doi: 10.1136/bmjopen-2019-029937 (PMC6701566; doi:10.1136/bmjopen-2019-029937), 2019-08-15
Supplement: bmjopen-2019-029937supp003.pdf [file bmjopen-2019-029937supp003.pdf]

### Supplementary File 3: Consolidated Criteria for Reporting Qualitative Research (COREQ): 32 Item Checklist

#### Adapted from:

Tong A, Sainsbury P, Craig J. Consolidated criteria for reporting qualitative research (COREQ): a 32-item checklist for interviews and focus groups. *International Journal for Quality in Health Care*. 2007. Volume 19, Number 6: pp. 349 – 357

|                                                | GUIDE QUESTION/DESCRIPTION                                        | REPORTED ON PAGE #                                                                  |
|------------------------------------------------|-------------------------------------------------------------------|-------------------------------------------------------------------------------------|
| <b>DOMAIN 1: Research team and Reflexivity</b> |                                                                   |                                                                                     |
| <b>Personal characteristics</b>                |                                                                   |                                                                                     |
| 1. Interviewer                                 | Which authors conducted the interviews?                           | Page 4                                                                              |
| 2. Credentials                                 | What were the researcher's credentials?                           | Page 4                                                                              |
| 3. Occupation                                  | What was their occupation?                                        | See submission form                                                                 |
| 4. Gender                                      | Was the researcher male or female?                                | Female                                                                              |
| 5. Experience and Training                     | What training or experience did the researcher have?              | Experienced qualitative researchers                                                 |
| <b>Relationship with participants</b>          |                                                                   |                                                                                     |
| 6. Relationship established                    | Was a relationship established prior to study commencement?       | No                                                                                  |
| 7. Participant knowledge of interviewer        | What did the participants know about the researcher?              | Brief introduction provided at start of interview (name/ role/ purpose of research) |
| 8. Interviewer characteristics                 | What characteristics were reported about the interviewer?         | As above.                                                                           |
| <b>DOMAIN 2: Study Design</b>                  |                                                                   |                                                                                     |
| <b>Theoretical framework</b>                   |                                                                   |                                                                                     |
| 9. Methodological orientation and theory       | What methodological orientation was stated to underpin the study  | Page 3                                                                              |
| <b>Participant selection</b>                   |                                                                   |                                                                                     |
| 10. Sampling                                   | How were participants selected?                                   | Page 3                                                                              |
| 11. Method of approach                         | How were participants approached?                                 | Page 3                                                                              |
| 12. Sample size                                | How many participants were in the study?                          | Page 4                                                                              |
| 13. Non-participation                          | How many people refused to participate/ dropped out? Reasons?     | Page 4<br>Some of those contacted did not return consent forms.                     |
| <b>Setting</b>                                 |                                                                   |                                                                                     |
| 14. Setting of data collection                 | Where was the data collected?                                     | Telephone interviews                                                                |
| 15. Presence of non-participants               | Was anyone else present besides the participants and researchers? | No                                                                                  |
| 16. Description of sample                      | What are the important characteristics of the sample?             | Pages 4, 13<br>Table 2                                                              |

| <b>Data collection</b>                 |                                                                                                              |                                                                                          |
|----------------------------------------|--------------------------------------------------------------------------------------------------------------|------------------------------------------------------------------------------------------|
| 17. Interview guide                    | Were questions, prompts, guides provided by the author?<br>Was it pilot tested?                              | Page 3<br>Supplementary file 1<br>Yes, Page 4                                            |
| 18. Repeat interviews                  | Were repeat interviews carried out?                                                                          | No                                                                                       |
| 19. Audio/visual recording             | Did the researcher use audio or visual recording equipment?                                                  | Page 4                                                                                   |
| 20. Field notes                        | Were field notes made during and/or after the interviews?                                                    | No                                                                                       |
| 21. Duration                           | What was the duration of the interviews?                                                                     | Page 4                                                                                   |
| 22. Data saturation                    | Was data saturation discussed?                                                                               | Pages 4 and 10<br>Data saturation was discussed as part of the standardisation meetings. |
| 23. Transcripts returned               | Were transcripts returned to participants for comment and/or correction                                      | No                                                                                       |
| <b>DOMAIN 3: Analysis and Findings</b> |                                                                                                              |                                                                                          |
| <b>Data analysis</b>                   |                                                                                                              |                                                                                          |
| 24. Number of data coders              | How many data coders coded the data?                                                                         | Page 4                                                                                   |
| 25. Description of the coding tree     | Did authors provide a description of the coding tree?                                                        | Table 3<br>Nvivo database available on request                                           |
| 26. Derivation of themes               | Were themes identified in advance or derived from the data?                                                  | Page 4. Themes derived from the data and mapped the TDF                                  |
| 27. Software                           | What software was used to manage the data?                                                                   | Nvivo 10                                                                                 |
| 28. Participant checking               | Did participants provide feedback on the findings                                                            | No                                                                                       |
| <b>Reporting</b>                       |                                                                                                              |                                                                                          |
| 29. Quotations presented               | Were participant quotations presented to illustrate the themes/findings?<br>Was each participant identified? | Pages 5-9; Table 3<br>Yes, each participant was given an ID number.                      |
| 30. Data and findings consistent       | Was there consistency between the data presented and the findings?                                           | Yes                                                                                      |
| 31. Clarity of major themes            | Were major themes clearly presented in the findings?                                                         | Pages 5-9<br>Figure 1                                                                    |
| 32. Clarity of minor themes            | Is there a description of diverse cases or discussion of minor themes                                        | Table 3<br>Figure 1                                                                      |
